# Supplementary material for: Association between niacin and mortality among patients with cancer in the NHANES retrospective cohort
Source: PubMed Central journal article supplement (PMC9661743; doi:10.1186/s12885-022-10265-4), 2022-11-14

**A**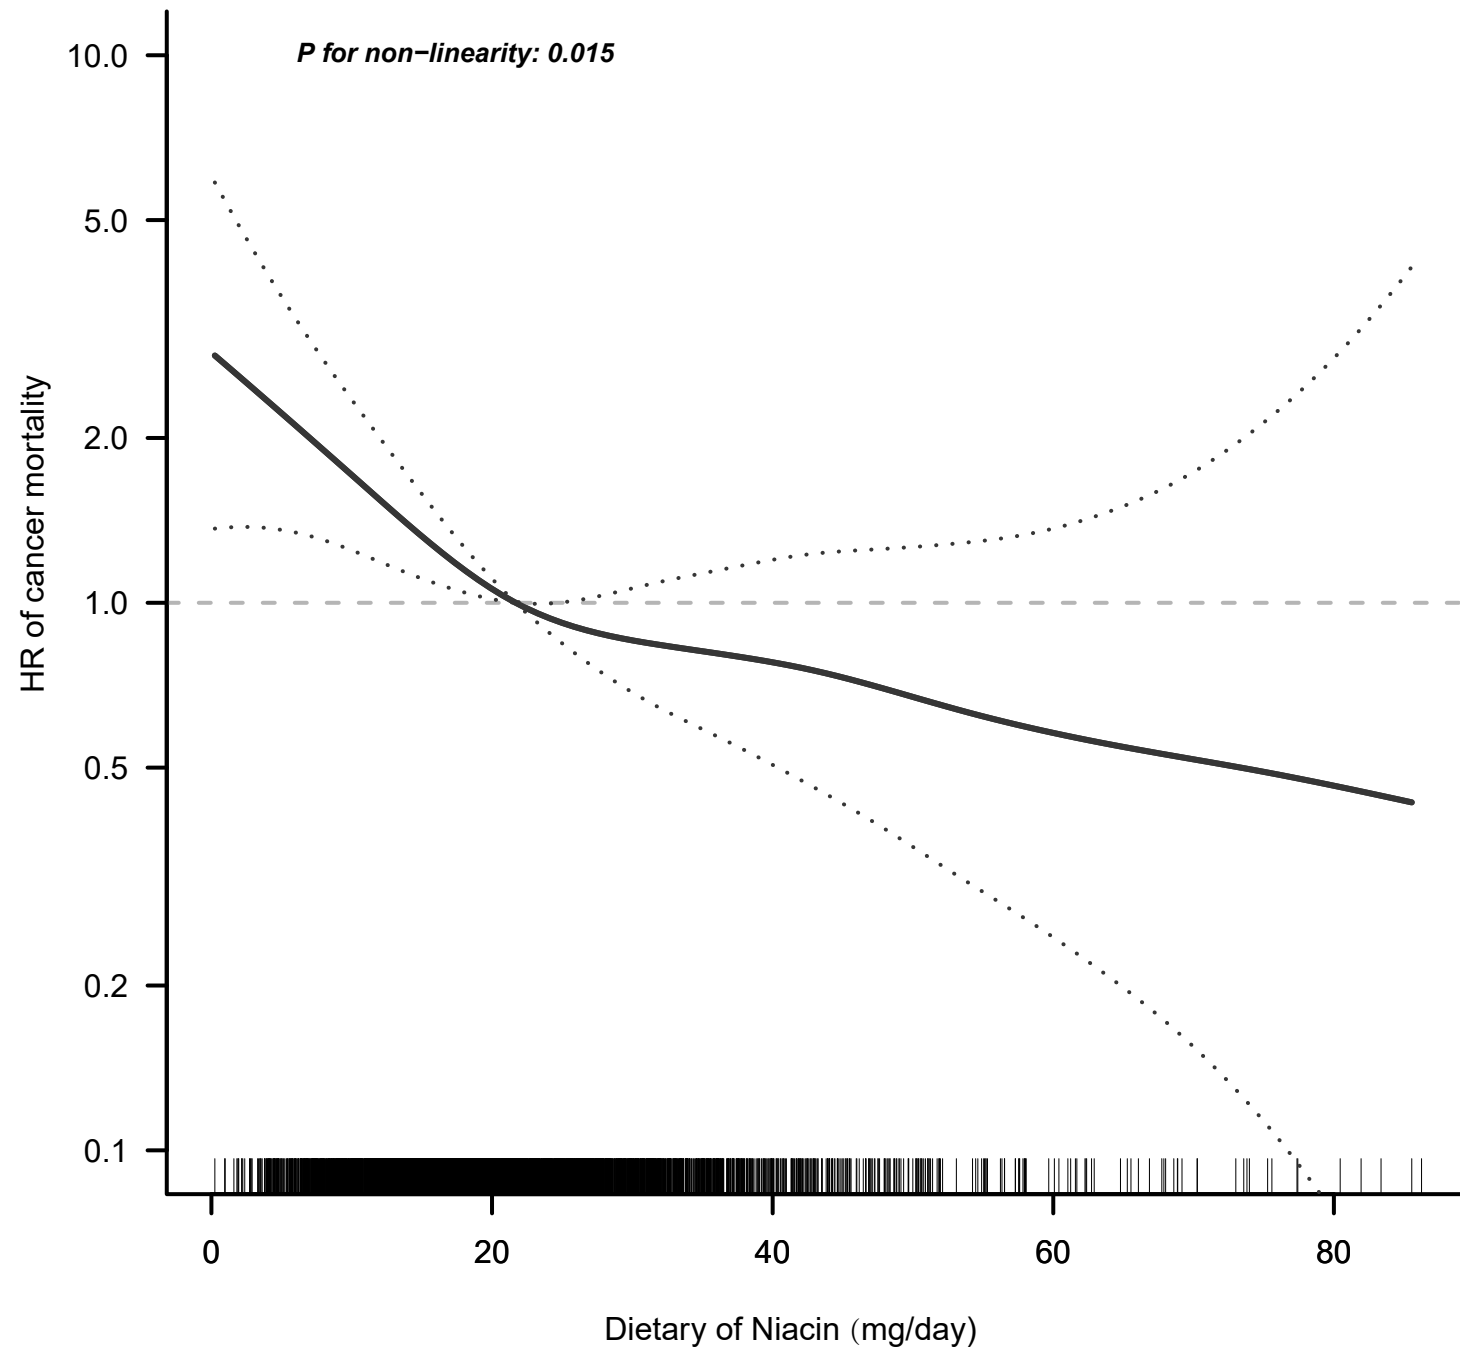**B**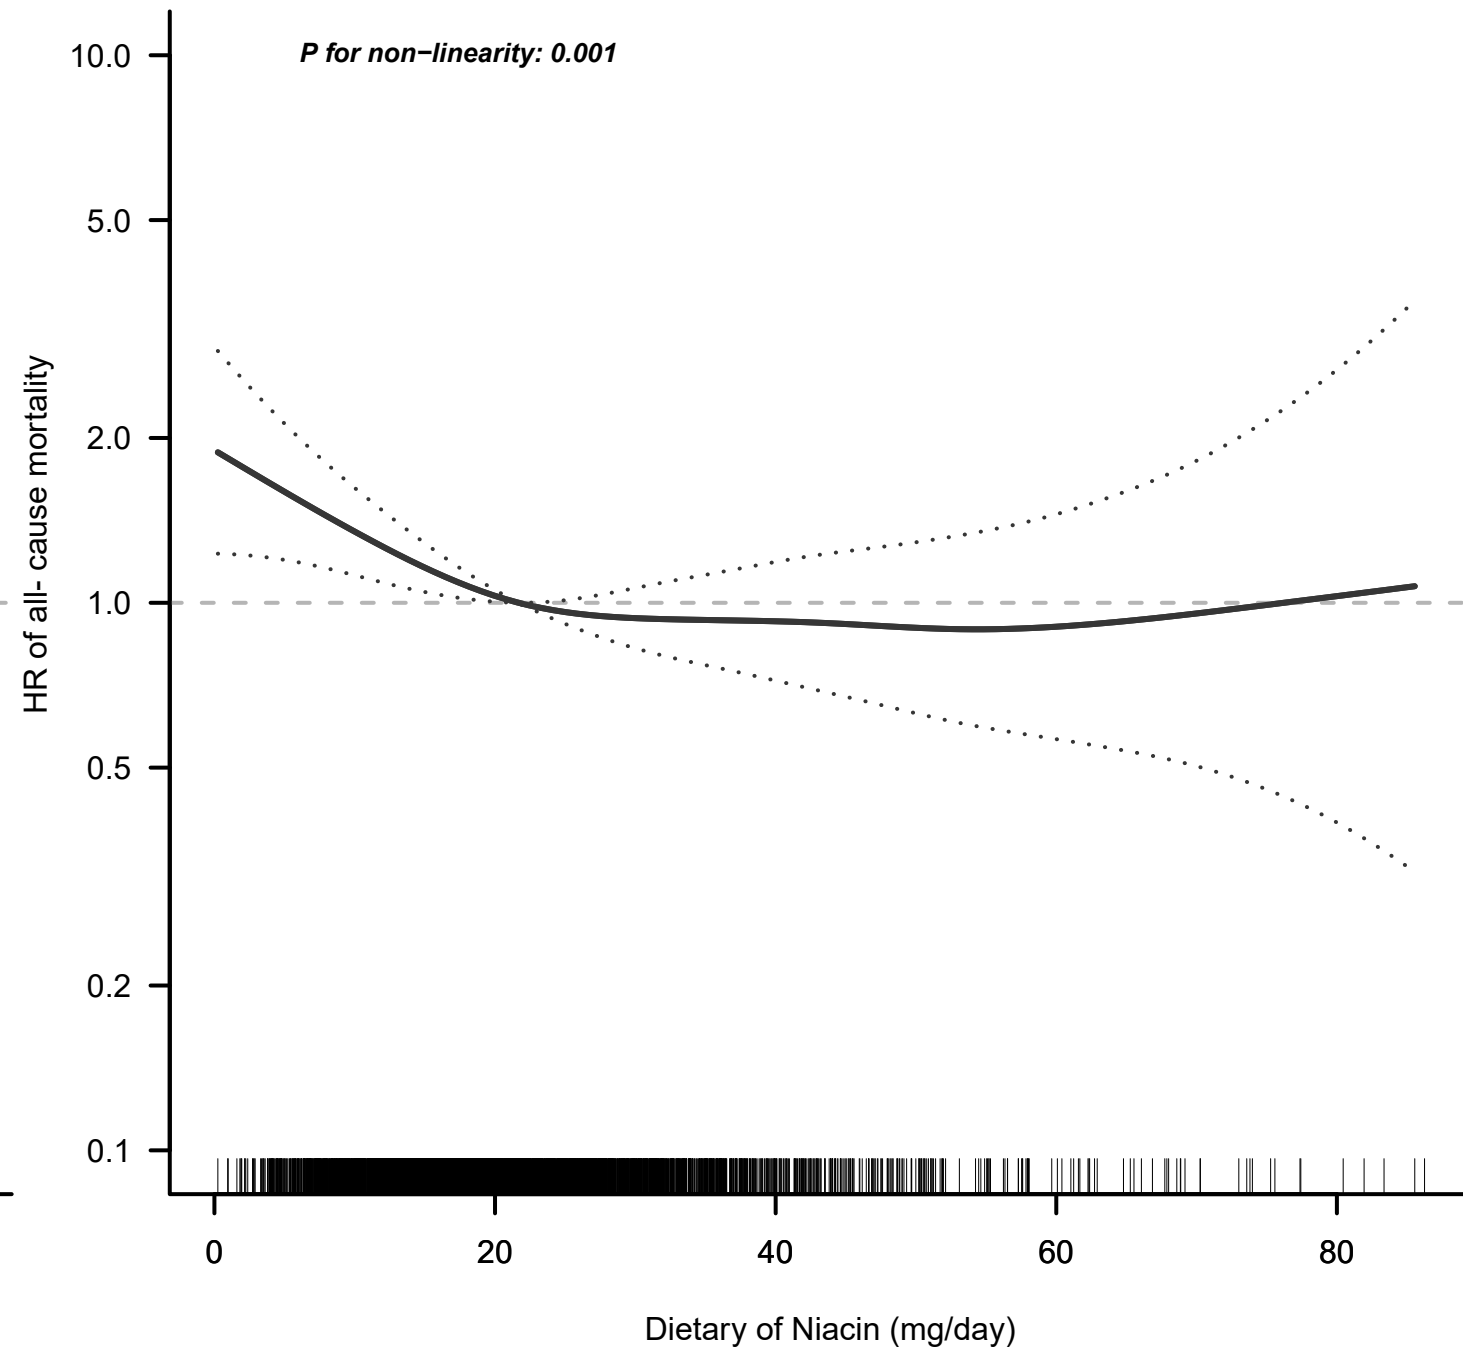

Supplement: 12885_2022_10265_MOESM1_ESM.pdf [file 12885_2022_10265_MOESM1_ESM.pdf]
