# Supplementary material for: Association between niacin and mortality among patients with cancer in the NHANES retrospective cohort
Source: PubMed Central journal article supplement (PMC9661743; doi:10.1186/s12885-022-10265-4), 2022-11-14

# A All-cause mortality

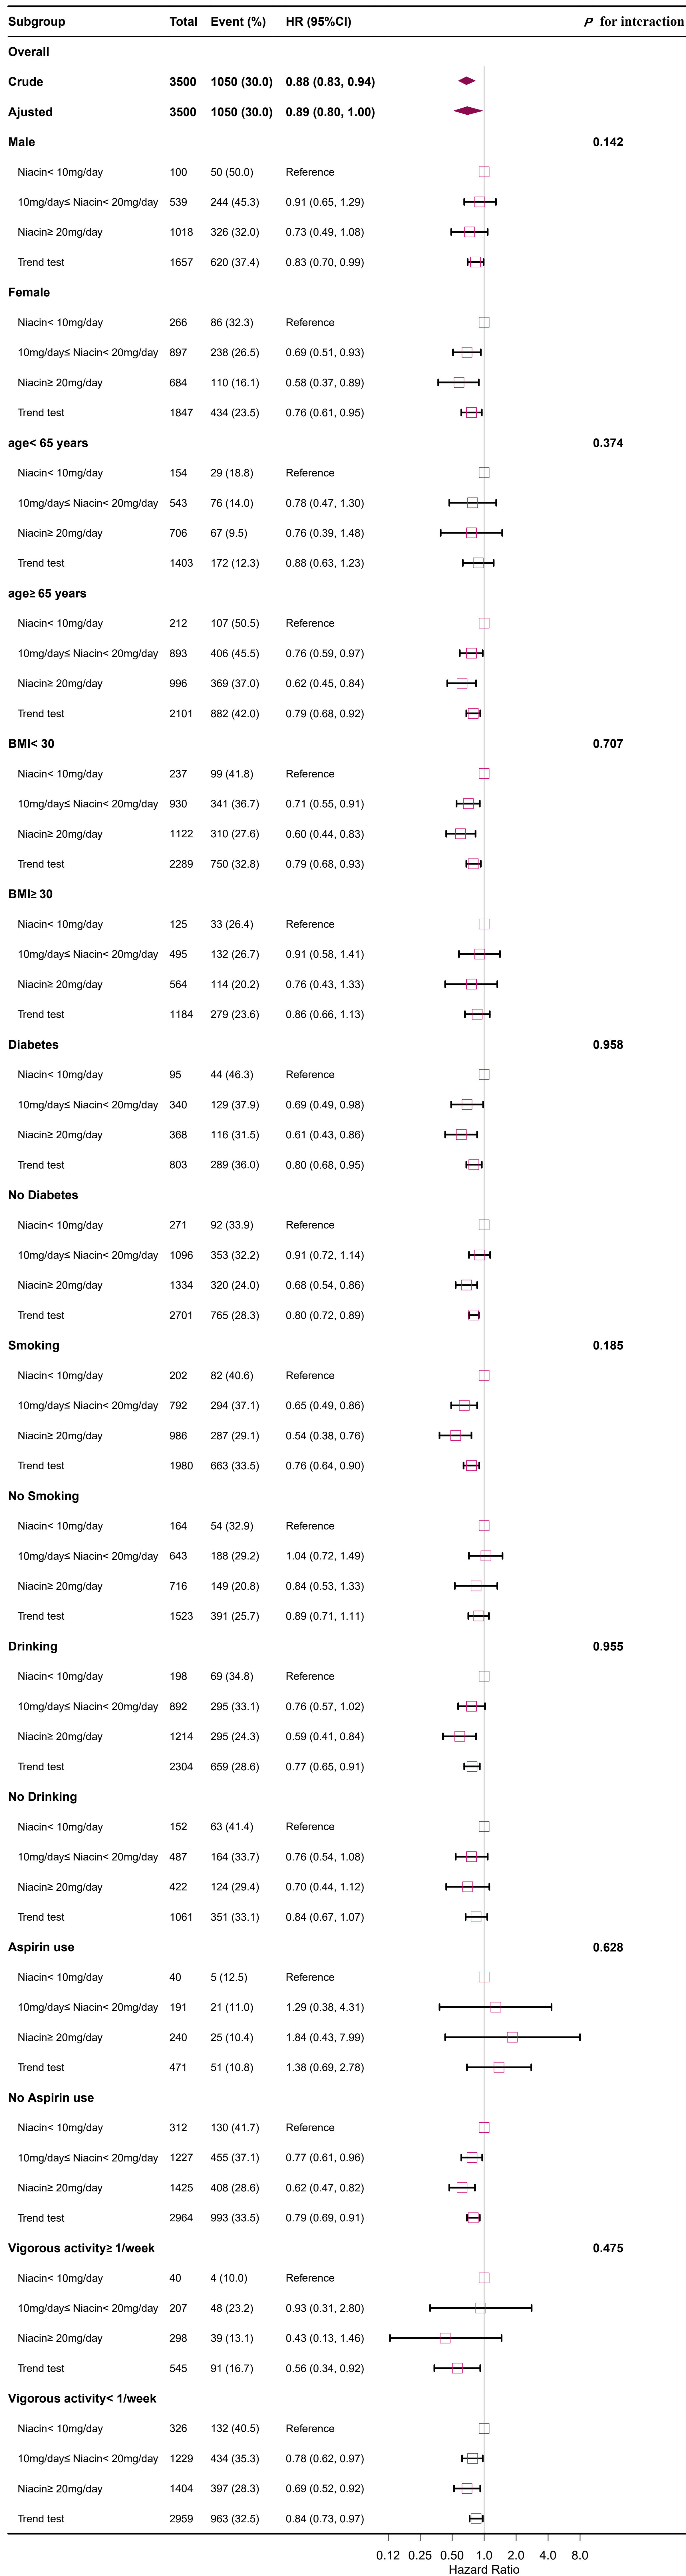

# B Cancer mortality

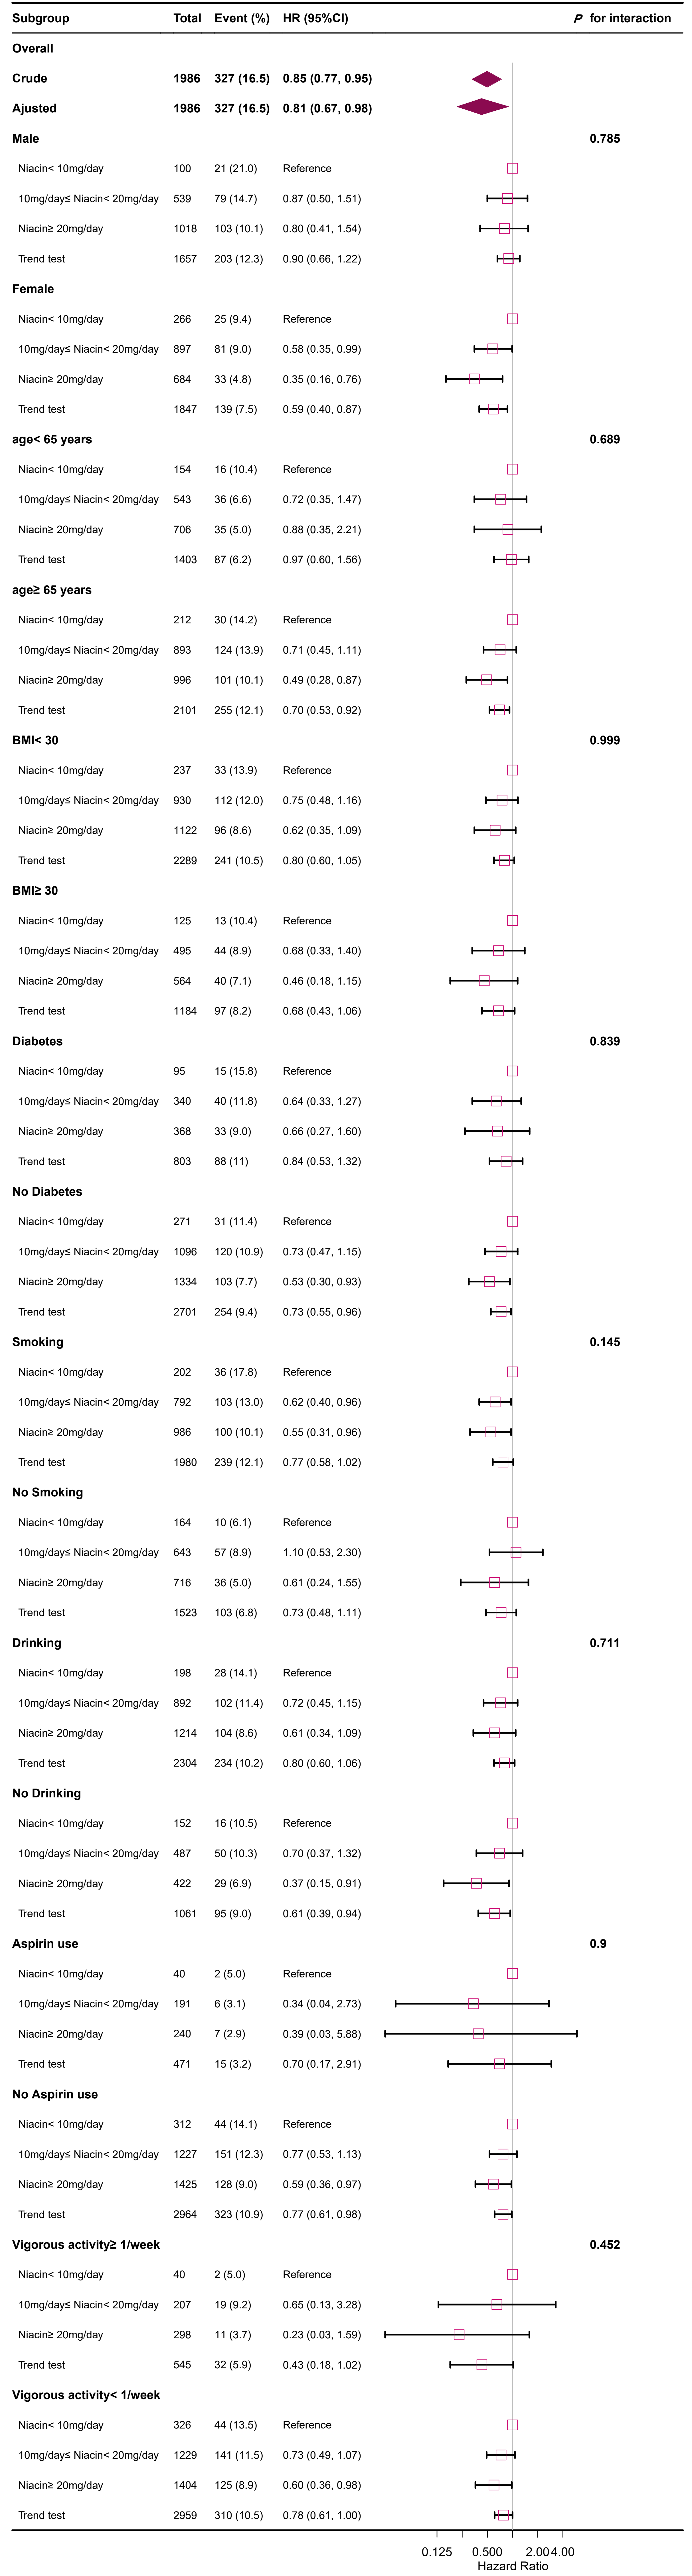

Supplement: 12885_2022_10265_MOESM3_ESM.pdf [file 12885_2022_10265_MOESM3_ESM.pdf]
